# Supplementary material for: Associations of Exposure to Air Pollution with Insulin Resistance: A Systematic Review and Meta-Analysis
Source: MDPI journal article supplement (doi:10.3390/ijerph15112593), 2018-11-20
Supplement: s1 [file s1]

**Table S1.** Meta-regression of age and IR biomarkers exposure to air pollutants.

| <b>Pollutants and IR biomarkers</b> | <b>% change</b> | <b>95%CI</b>      | <b>SE</b> | <b>z-value</b> | <b>p-value</b> |
|-------------------------------------|-----------------|-------------------|-----------|----------------|----------------|
| PM <sub>2.5</sub> and HOMA-IR       | 0.0378          | (-0.6293, 0.7048) | 0.3403    | 0.1110         | 0.9116         |
| PM <sub>2.5</sub> and glucose       | 0.0088          | (-0.0259, 0.0435) | 0.0177    | 0.4957         | 0.6201         |
| PM <sub>2.5</sub> and insulin       | 0.3130          | (-0.5472, 1.1733) | 0.4389    | 0.7132         | 0.4757         |
| PM <sub>2.5</sub> and HbA1c         | 0.1069          | (-0.1006, 0.3145) | 0.1059    | 1.0097         | 0.3126         |
| PM <sub>2.5</sub> and leptin        | 1.8871          | (-1.6166, 5.3908) | 1.7876    | 1.0556         | 0.2911         |
| NO <sub>2</sub> and HOMA-IR         | 0.5132          | (-0.6013, 1.6277) | 0.5686    | 0.9026         | 0.3668         |
| NO <sub>2</sub> and glucose         | 0.0356          | (-0.0084, 0.0795) | 0.0224    | 1.5864         | 0.1126         |
| NO <sub>2</sub> and insulin         | 0.6673          | (-0.8950, 2.2296) | 0.7971    | 0.8371         | 0.4025         |
| PM <sub>10</sub> and HOMA-IR        | 0.1624          | (-0.6078, 0.9326) | 0.3930    | 0.4133         | 0.6794         |

SE (Standard error): The standard error of a statistic (usually an estimate of a parameter) is the standard deviation of its sampling distribution or an estimate of that standard deviation.

**Table S2.** Specifics of quality score of the included studies.

|                                                                          | Thiering et al. (2013) | Wolf et al. (2016) | Thiering et al. (2016) | Madhlouma et al. (2017) | Alderete et al. (2017) | Li et al. (2018) |
|--------------------------------------------------------------------------|------------------------|--------------------|------------------------|-------------------------|------------------------|------------------|
| NOS quality score                                                        | 7                      | 7                  | 6                      | 7                       | 6                      | 8                |
| <b>Selection</b>                                                         |                        |                    |                        |                         |                        |                  |
| <b>1) Representativeness of the exposed cohort</b>                       |                        |                    |                        |                         |                        |                  |
| a) truly representative of the average _____ (describe) in the community |                        |                    |                        |                         |                        |                  |
| b) somewhat representative of the average _____ in the community         | b                      | b                  | c                      | c                       | c                      | b                |
| c) selected group of users eg nurses, volunteers                         |                        |                    |                        |                         |                        |                  |
| d) no description of the derivation of the cohort                        |                        |                    |                        |                         |                        |                  |
| <b>2) Selection of the non-exposed cohort</b>                            |                        |                    |                        |                         |                        |                  |
| a) drawn from the same community as the exposed cohort                   | b                      | a                  | b                      | a                       | a                      | a                |

- b) drawn from a different source
- c) no description of the derivation of the non-exposed cohort

- a) secure record (eg surgical records)
- b) structured interview
- c) written self-report
- d) no description

4) **Demonstration that outcome of interest was not present at start of study**

- a) yes  
b) no

**1) Comparability of cohorts on the basis of the design or analysis**

- study controls for \_\_\_\_\_ (select the most important factor)
- study controls for any additional factor (This criteria could be modified to indicate specific control for a second important factor.)

## Outcome

- a) independent blind assessment
- b) record linkage
- c) self-report
- d) no description

2) Was follow-up long enough for outcomes to occur

- a) yes (select an adequate follow up period for outcome of interest)  
b) no

**3) Adequacy of follow up of cohorts**

a) complete follow up - all subjects accounted for

**b)** subjects lost to follow up unlikely to introduce bias - small number  
lost - > \_\_\_\_ % (select an adequate %) follow up, or description  
provided of those lost)

b

b

b

b

d

b

c) follow up rate < \_\_\_\_% (select an adequate %) and no description of  
those lost

d) no statement

---
